# Supplementary material
Source: publisher figshare collection journal article supplement (https://gsajournals.figshare.com/articles/dataset/_/15176115)
Supplement: Supplementary file 1 [file 1]

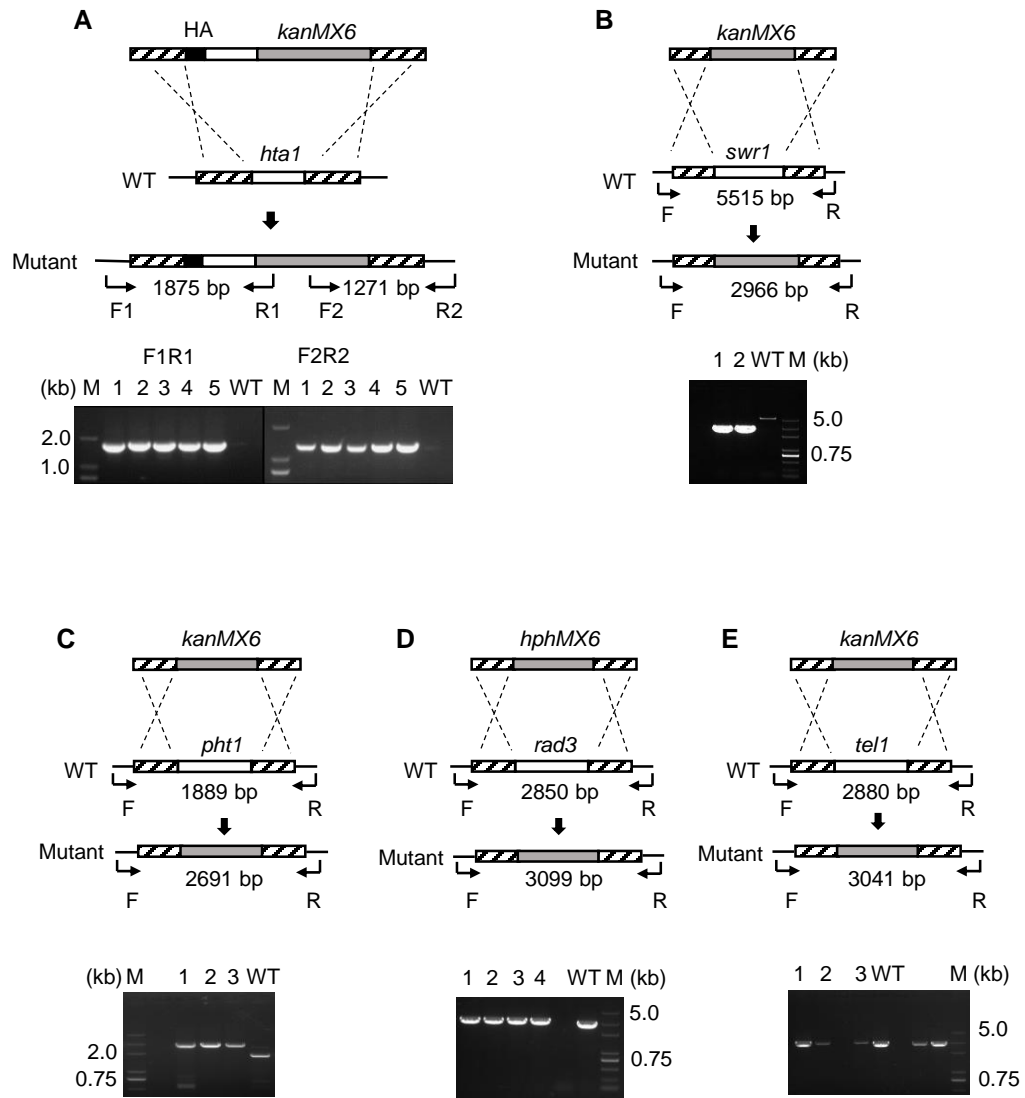

**Figure S1.** Gene disruption by homologous recombination. (A) *hta1*, (B) *swr1*, (C) *pht1*, (D) *rad3* and (E) *tel1*. Flanking DNA (hatched boxes, upstream of start codon and downstream of stop codon) and coding region of genes were amplified and linked respectively to selection gene *kanMX6* or *hphMX6* by overlapping PCR to yield linear substrate for homologous recombination in WT cells. For *hta1*, 3× HA fragment (black box) included. Positive colonies were selected on YES medium with 75 µg/ml G418 or YES medium with 75 µg/ml hygromycin B and gene disruption mutations were identified by PCR with primers as shown (F1+R1, F2+R2, F+R), M: DNA marker.

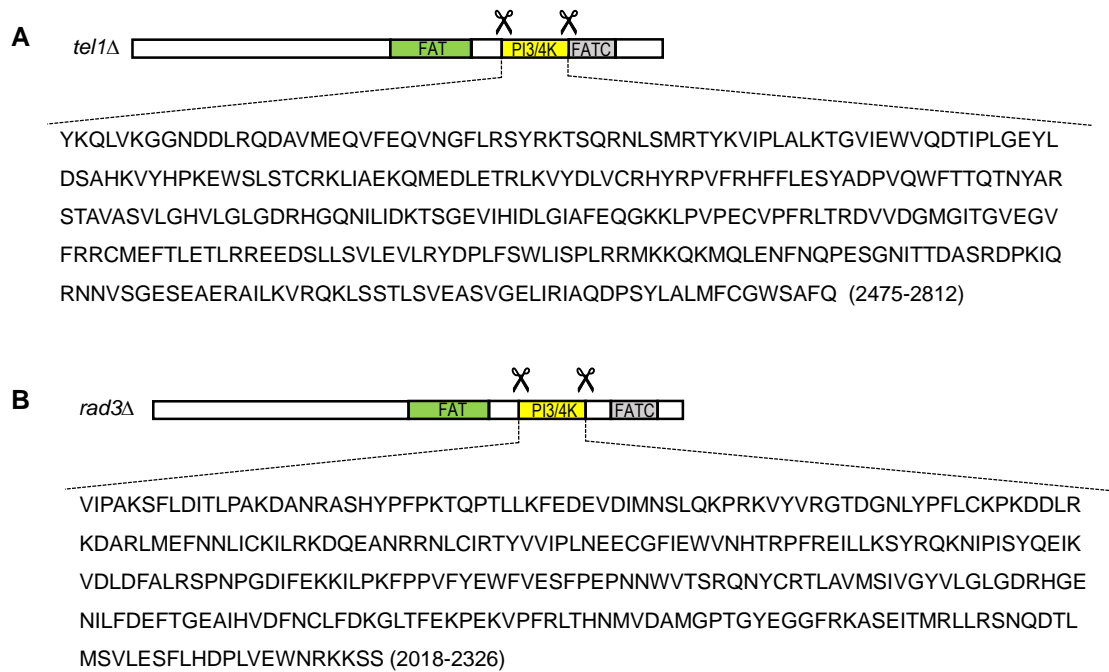

**Figure S2.** Deletion of P3/4K domain in *tel1Δ* (A) and *rad3Δ* (B). Scissors mark extent of deletion. PI3/4K, Phosphatidylinositol 3-/4-kinase catalytic domain; FAT, FRAP-ATM-TRRAP domain; FATC, FAT-C-terminal domain.

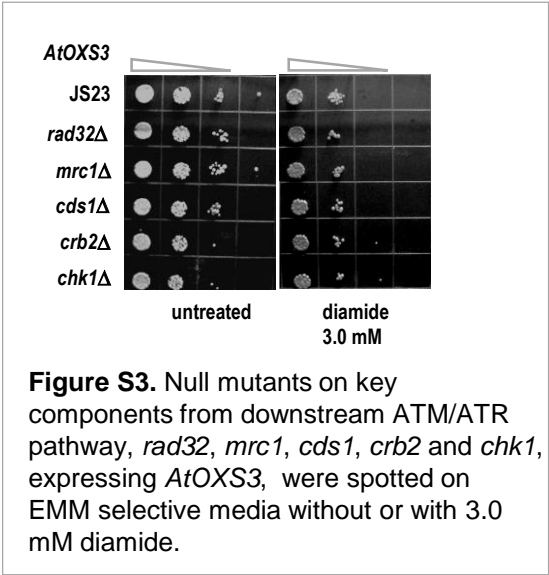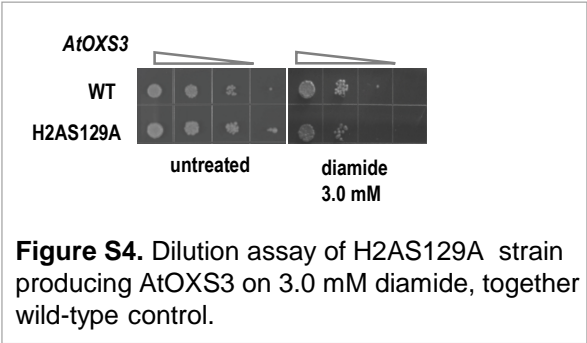

|              |                                                               |     |
|--------------|---------------------------------------------------------------|-----|
| H2A.Z        | MSGGGKGKHHVGGKGGSIKGERGQMSHSARAGLQFPVGRVRRFLKAKTQNNMRVGAKSAVY | 60  |
| H2A $\alpha$ | MSGGK-----SGGKAAVAKSAQSRSAKAGLAFPVGRVHRLLRKG-NYAQRVGAGAPVY    | 52  |
| H2A $\beta$  | MSGGK-----SGGKAAVAKSAQSRSAKAGLAFPVGRVHRLLRKG-NYAQRVGAGAPVY    | 52  |
| H2A.Z        | SAAVLEYLTAEVLELAGNAAKDLKVKRIIPRHLQLAIRGDEELDTLIR-ATIAGGGVLP   | 119 |
| H2A $\alpha$ | LAHVLEYLAAEILELAGNAARDNKKTRIIPRHLQLAIRNDEELNKLGHVTIAQGGVVP    | 112 |
| H2A $\beta$  | LAHVLEYLAAEILELAGNAARDNKKTRIIPRHLQLAIRNDEELNKLGHVTIAQGGVVP    | 112 |
| H2A.Z        | INKQLLIRTKKYPPEEEII*                                          | 139 |
| H2A $\alpha$ | INAHLLPKTSGRTGKPSQEL*                                         | 132 |
| H2A $\beta$  | INAHLLPKQSGK-GKPSQEL*                                         | 131 |

**Figure S5.** Alignment of *S. pombe* H2A histones. Non-conserved residues are represented with a white background. SQE motifs highlighted in orange, and the red letters indicate the potential phosphosites within the C-terminal tails of H2A $\alpha$  and H2A $\beta$  besides of SQE motif.

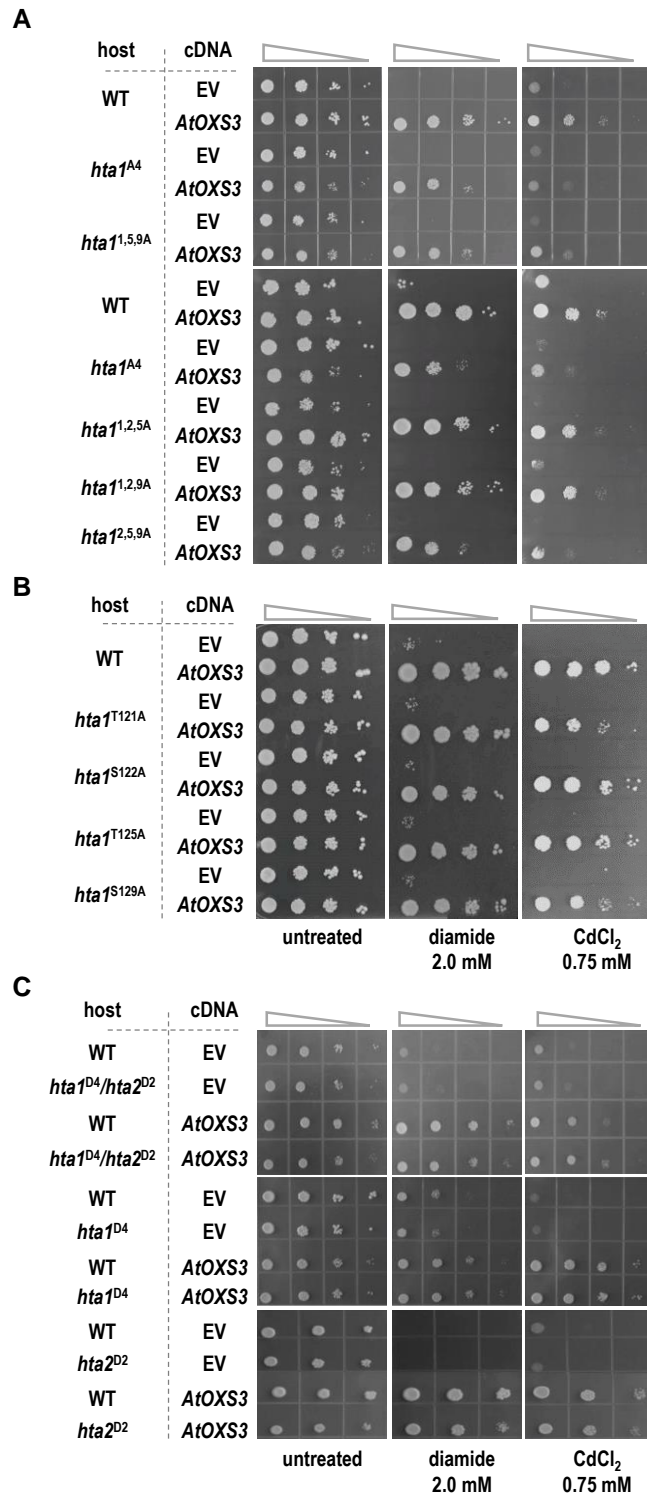

**Figure S6.** Tolerance assay to diamide and CdCl<sub>2</sub> on H2AX mutants. Serial dilution of alanine substitution in (A) four triple mutants *hta1<sup>1,5,9A</sup>*, *hta1<sup>1,2,5A</sup>*, *hta1<sup>1,2,9A</sup>*, and *hta1<sup>12,5,9A</sup>*; *hta1<sup>A4</sup>*(*hta1*-T121A, S122A, T125A, S129A) was used as the negative control; (B) four single mutants *hta1<sup>T121A</sup>*, *hta1<sup>S122A</sup>*, *hta1<sup>T125A</sup>* and *hta1<sup>S129A</sup>*; and aspartic acid substitution in (C) double mutant *hta1<sup>D4</sup>hta2<sup>D2</sup>*, two single mutants *hta1<sup>D4</sup>* and *hta2<sup>D2</sup>*, together with WT control transformed with EV or AtOXS3 on EMM selective media containing the indicated concentration of diamide or CdCl<sub>2</sub>. EV, empty vector pART1. Photographs show representative images from three independent experiments.

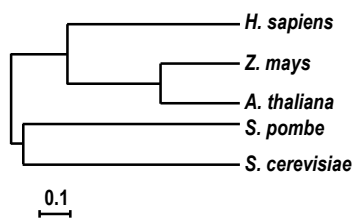

**Figure S7.** Phylogenetic tree of Swc2 among *S. pombe*, *Saccharomyces cerevisiae* (*S. cerevisiae*), *Homo Sapiens* (*H. sapiens*), *Arabidopsis thaliana* (*A. thaliana*) and *Zea. Mays* (*Z. mays*) from MEGA X by neighbor-Joining method with 1000 bootstrap replicates. Scale bar (0.1) indicates the number of nucleotide substitutions per site.
